# Barriers and Facilitators for the Implementation of Primary Prevention and Health Promotion Activities in Primary Care: A Synthesis through Meta-Ethnography

Maria Rubio-Valera<sup>1,2\*</sup>, Mariona Pons-Vigués<sup>2,3,4</sup>, María Martínez-Andrés<sup>2,5</sup>, Patricia Moreno-Peral<sup>2,6</sup>, Anna Berenguera<sup>2,3,4</sup>, Ana Fernández<sup>1,2,7</sup>

**1** Research and Development Unit, Fundació Sant Joan de Déu, Esplugues de Llobregat, Barcelona, Spain, **2** Spanish Research Network on Preventative Activities and Health Promotion in Primary Care (RedIAPP), Spain, **3** Research Department, Institut Universitari d'Investigació en Atenció Primària Jordi Gol (IDIAP Jordi Gol), Barcelona, Spain, **4** Departamento de Psicología clínica y de la Salud, Universitat Autònoma de Barcelona, Bellaterra, Spain, **5** Social and Health Care Research Center, University of Castilla-La Mancha, Cuenca, Spain, **6** Research Unit, Distrito Sanitario Malaga, Fundación Pública Andaluza para la Investigación de Málaga en Biomedicina y Salud (IMABIS Foundation), Málaga, Spain, **7** Centre for Disability Research and Policy, Faculty of Health Sciences, The University of Sydney, Sydney, Australia

## Abstract

**Background:** Evidence supports the implementation of primary prevention and health promotion (PP&HP) activities but primary care (PC) professionals show resistance to implementing these activities. The aim was to synthesize the available qualitative research on barriers and facilitators identified by PC physicians and nurses in the implementation of PP&HP in adults.

**Methods and Findings:** A systematic search of three databases was conducted and supported by manual searches. The 35 articles included were translated into each other and a new interpretation of the concepts extracted was generated. The factors affecting the implementation of PP&HP activities in PC according to professionals were fitted into a five-level ecological model: intrapersonal factors, interpersonal processes, institutional factors, community factors and public policy. At the intrapersonal level we find professionals' beliefs about PP&HP, experiences, skills and knowledge, and selfconcept. The attitudes and behavior towards PP&HP of patients, specialists, practice managers and colleagues (interpersonal factors) affect the feasibility of implementing PP&HP. Institutional level: PC is perceived as well-placed to implement PP&HP but workload, lack of time and referral resources, and the predominance of the biomedical model (which prioritizes disease treatment) hamper the implementation of PP&HP. The effectiveness of financial incentives and tools such as guidelines and alarms/reminders is conditioned by professionals' attitudes to them. Community factors include patients' social and cultural characteristics (religion, financial resources, etc.), local referral resources, mass-media messages and pharmaceutical industry campaigns, and the importance given to PP&HP in the curriculum in university. Finally, policies affect the distribution of resources, thus affecting the implementation of PP&HP.

**Conclusions:** Research on barriers and facilitators in the implementation of PP&HP activities in multirisk management is scarce. The conceptual overview provided by this synthesis resulted in the development of practical recommendations for the design of PP&HP in PC. However, the effectiveness of these recommendations needs to be demonstrated.

**Citation:** Rubio-Valera M, Pons-Vigués M, Martínez-Andrés M, Moreno-Peral P, Berenguera A, et al. (2014) Barriers and Facilitators for the Implementation of Primary Prevention and Health Promotion Activities in Primary Care: A Synthesis through Meta-Ethnography. PLoS ONE 9(2): e89554. doi:10.1371/journal.pone.0089554

**Editor:** Diane Medved Harper, University of Missouri Kansas City School of Medicine, United States of America

**Received:** September 9, 2013; **Accepted:** January 21, 2014; **Published:** February 28, 2014

**Copyright:** © 2014 Rubio-Valera et al. This is an open-access article distributed under the terms of the Creative Commons Attribution License, which permits unrestricted use, distribution, and reproduction in any medium, provided the original author and source are credited.

**Funding:** The authors have no support or funding to report.

**Competing Interests:** The authors have declared that no competing interests exist.

\* E-mail: mrubio@pssjd.org

## Introduction

Despite the evidence supporting the effectiveness and benefits of primary prevention and health-promotion (PP&HP) activities in reducing both the risk and incidence of health-related problems in a number of areas [1–4], these are still not standard practice in primary care [5].

Primary care professionals have regular contact with the vast majority of the population, learn about the patients' social situation, provide continuous care and have access to referral service resources within the healthcare system and through community [6]. These all place primary care professionals in a

good position to readily conduct PP&HP both in at-risk patients and in the general population as part of the comprehensive care program [7]. However, primary care professionals show resistance to implementing these activities, citing barriers in clinical practice such as workload and lack of skills and knowledge, problems related to the professional-patient relationship and lack of confidence in the effectiveness of these interventions [8,9].

Several qualitative studies have been conducted to gather data on primary care professionals' views on PP&HP but these have tended to focus on the prevention of specific diseases or the promotion of specific health activities or lifestyle-modification

factors. Physicians and nurses in primary care are faced with patients with multiple lifestyle health risks and so encounter various barriers when implementing multi-strategy PP&HP activities, which are considered complex interventions. Furthermore, primary care is a complex system where patients and professionals' objectives may not always be in harmony and barriers in distinct disciplines can vary widely. If a preventive strategy is to be successfully implemented in primary care, as with any complex intervention, one of the first steps is to identify the major obstacles and strategies for optimum intervention implementation. Dissemination and implementation science also stress the importance of evaluating the barriers and facilitators for the translation of effective and efficient programs into practice [10]. The best approach to identifying barriers and facilitators in the development of an intervention, from the perspective of the agents that have to implement it, is the use of qualitative studies [11,12].

Synthesis of the qualitative evidence on barriers and facilitators for PP&HP in primary care will provide researchers, decision-makers and health professionals with a global picture of the difficulties and opportunities that primary care professionals face when developing a primary preventive strategy.

The study objective was to synthesize the available qualitative research on barriers and facilitators identified by primary care physicians and nurses in the implementation of PP&HP in adults through meta-ethnography.

## Methods

For the qualitative synthesis, we used a meta-ethnographic approach to aggregate the information, re-interpret it and develop a fresh contribution to the literature. This approach was developed by Noblit and Hare [13], and adapted to health research by Britten and colleagues [14].

## Research Question

We searched for qualitative studies exploring physicians and nurses' perceptions regarding the implementation of primary prevention and health-promotion activities addressed to adults in a primary care context. The phenomena of interest were the factors (barriers and facilitators) that have an impact on the implementation of these activities.

## Study Search

Two reviewers (AF and MRV) independently searched three electronic databases: Pubmed (inception-October 2012), Web of Knowledge and CINAHL (inception-January 2013). The databases listed were searched using strategies designed to maximize sensitivity. These are detailed in Table S1. For the hand search, to include as much relevant information as possible, colleagues and team members were asked to suggest relevant papers they were aware of and the bibliographies of retrieved articles were checked for studies not identified in the original electronic search [15].

## Inclusion Criteria and Study Selection

Studies written in English or Spanish were included when they explored the perceptions of primary care physicians and nurses by using qualitative methods for both data collection and analysis. Studies using mixed methods were included if the qualitative findings were reported and discussed separately from the non-qualitative findings. The focus of the study had to be primary prevention of chronic conditions or health promotion (lifestyle changes). Studies focused on vaccines, children or secondary or tertiary prevention were excluded (e.g., treatment of alcohol addiction, prevention of recurrence, prevention of diabetes

complications). Papers interviewing professionals from different health settings (e.g., specialists, homeopaths, and physiotherapists) where the specific discourse of the primary health care professionals could not be discerned were also excluded. Studies were excluded if the focus lacked sufficient relevance or if the data was not analyzed qualitatively.

Identified studies were screened, in duplicate (AF and MRV), by reviewing the title and published abstract. The final full-text review and selection was made in triplicate by the two reviewers that had conducted the searches, and an extra reviewer (MPV, MMA, PM or AB). In cases of disagreement, the six researchers reviewed the paper and reached agreement.

## Quality Appraisal

There is no absolute list of criteria for quality appraisal in qualitative research studies. The use of checklists for the evaluation of the quality of qualitative studies has been much criticized [16,17] and there is a notable lack of consensus when categorizing papers according to different quality appraisal methods [18]. As in a previous synthesis [19,20], quality was not numerically scored but discussed in terms of research coherence and taking the utility of findings into account [21]. Also considered were the appropriateness of the research design to the research question, the adequacy of the data collection procedures, the appropriateness and rigor of analysis and the presentation of primary data.

## Data Abstraction and Synthesis

Two reviewers independently extracted study characteristics (methodology and sampling characteristics) and the key findings of the studies included by using an abstraction form in which they differentiated between first-order constructs (views expressed by the professionals interviewed in the original studies) and second-order constructs (interpretations made by the original authors based on the views of the respondents). The abstraction form allowed the reviewers to include comments and personal interpretations of the data as well as ideas for the third-order constructs. When necessary, the corresponding authors of the original papers were contacted to obtain extra information (12 out of 18 authors contacted provided responses).

Papers were then read again in inverse chronological order (last published papers first) by AF and MRV who, taking into account the abstraction forms, completed a table where first and second-order findings were listed and grouped. As a starting point for extraction, we grouped and mapped the second-order information into concepts that followed a series of stages developed by the research team for the delivery of PP&HP in primary care (1-Assessment of risk and/or healthy lifestyles, 2-Motivational interview, 3-Education/Advice, 4-Follow-up, 5-Referral) which we considered to be affected by cross-cutting issues related to the patient and the practitioners at the Micro level and other factors at the Meso and Macro levels (factors associated with practice and the health system model, and cultural aspects). Since the original authors used various words to refer to the same interpretation of results, we translated the results of the papers into a common form by extracting the information piece by piece through a process of constant comparison. To achieve this, we listed the second-order information from the first paper taking special care to respect the authors' original terminology. Subsequently, we extracted the findings from the second study, grouping similar concepts and adding new original-author terms for the same category to the description of the category. When key concepts were related but not exactly the same, they were extracted separately but grouped together in the extraction grid.

The process was repeated with all the studies until they had all been translated into each other [14]. During the process of translation, new interpretations and relationships between concepts (third-order information) emerged and were recorded for subsequent consideration in the re-interpretation of the data. When all the studies had been translated and aggregated into the grid, it was reviewed by the authors that had not participated in the translation process and who had checked that the first and second-order information that they had extracted from the original work had been adequately considered and translated in the grid.

By using the synthesis of the first and second-order information, we then generated the third-order constructs [14]. For the third-order synthesis (the interpretation of interpretations), the concepts or factors and categories (groups of concepts) were refined and the relationships between categories of factors were re-organized producing modifications in the first series of stages. Several reconceptualizations of the findings were developed and refined, following a line-of-argument synthesis that became a model that was fitted to an Ecological Model [22]. This was carried out by AF and MRV and reviewed and discussed by all the authors.

The synthesis was externally audited from commencement to conclusion by a group of researchers from the “Qualitative Health Research Group” (led by Dr Vázquez ML) of the “Consorci de Salut i Social de Catalunya” as well as by Primary Care professionals and researchers from the Spanish “Research Network on Preventative Activities and Health Promotion in Primary Care” (RedIAPP).

## Results

### Studies Identified

The database and manual search yielded 1,748 records and 35 were finally included in the synthesis (Fig. 1) [8,9,23–55]. Most of the studies interviewed GPs only (20), nurses only (5) or GPs and nurses (5) (see Table 1 for study characteristics). For data collection, the main methods used were semi-structured interviews and/or focus groups.

Most of the studies had been conducted in the UK (13), Denmark (4) and USA (3). Ten of the studies focused on primary prevention and/or health promotion in general terms while 13 of the studies focused on lifestyle risk factors including smoking, unhealthy eating, alcohol consumption and sedentary habits. The remaining studies focused on reduction of cardiovascular risk (8) (including use of lipid-lowering drugs), control of obesity (3) or prevention of type 2 diabetes (1).

### Quality Appraisal

The methods used in the studies were appropriate to answer the research questions. The analysis strategy, although poorly described in some of the studies, seemed appropriate, the presentation of the results was adequate and the conclusions of the studies were supported by the evidence presented. All the studies included showed coherence regarding research question and objectives, the methods used, the analysis strategy and the presentation of the results.

Many studies reported limited information on the theoretical context, the position of the researchers, the sampling strategy, the analysis strategy and the measures taken to ensure the rigor of the research and the validity of the findings. There was also limited information on the cultural and social context in which the study was conducted.

## Synthesis

A representation of the factors affecting the implementation of PP&HP activities in PC according to GPs and nurses is shown in Fig. 2. These third-order factors are arranged into five levels of influence on health professionals’ behavior (multi-layer model that goes from micro to macro levels): intrapersonal factors, interpersonal processes, institutional factors, community factors and public policy.

Lower levels are affected by factors at the higher levels and factors at the same level can affect each other. The translation of the first and second-order constructs into third-order constructs and factors are summarized in Table 2 along with the paper from which first and second-order constructs are extracted.

**Intrapersonal factors.** At this level we found: professionals’ beliefs about PP&HP [8,9,23–25,27–29,31–49,51–55], their experiences in dealing with a particular risk factor or required lifestyle modification [33,49,50], appropriate skills and knowledge [8,9,23–29,31–37,39–49,51–54], their motivation [34–36,37,44,48,51], their attitudes [9,23–25,27,28,31,33,35–43,46–49,51–55] and their self-concept (self-confidence in their capacities and personal experiences with the problem: e.g., a smoker physician dealing with tobacco cessation or an obese nurse dealing with nutrition recommendations) [9,23,27–29,33,34,37,39,41,45–49,51–53]. The beliefs are related to the consideration of risk as a disease or not, the effectiveness and/or efficiency of PP&HP activities, negative aspects (side-effects) of risk assessment and the medicalization of life, the use of medication as a preventive strategy (e.g., statins for cardiovascular-risk reduction), questions about which patients could benefit and who should be responsible for these activities, etc. These beliefs, together with the other factors described, affect motivation and attitudes towards PP&HP.

Some PC professionals discuss PP&HP from a biomedical perspective [8,9,23,25–27,34,35,38,39,42,45,47,52,54,55]. From this perspective, which gives little importance to social factors, the prevention of disease and the promotion of healthy lifestyles are omitted. The reduction of risk, which is not considered a disease itself, is seen by professionals as peripheral to their field of work (it is an educational task and the responsibility of the community or the Government). Some professionals in this position describe these activities as uninteresting or even dull, boring and tedious [42]. From this perspective, the use of preventive medication, which is easier to prescribe than lifestyle modification activities, is preferred.

On the other hand, the PC professionals that adopt a biopsychosocial perspective perceive PP&HP as an important part of their role and thus feel responsible for implementing these activities in practice. This is related to their position in terms of who should be considered responsible when implementing PP&HP interventions. Professionals who think that PP&HP activities should only be addressed to high-risk patients (thus with a higher probability of developing a disease) are more accepting of implementing them in PC. In contrast, if PP&HP is to be implemented in the whole population, the PC professionals will share the responsibility with schools, the community and the media, and will play a limited role in it. This holistic approach is seen as utopian by some PC professionals.

There are two factors that affect professionals’ motivation, the patient and the health system. Even when professionals have a positive attitude towards PP&HP, if they feel the patient is not interested, or does not adhere to their recommendations, they feel frustration. PC professionals think that the health system expects them to conduct PP&HP activities. This can also prove frustrating if the self-concept is low and/or the resources available are

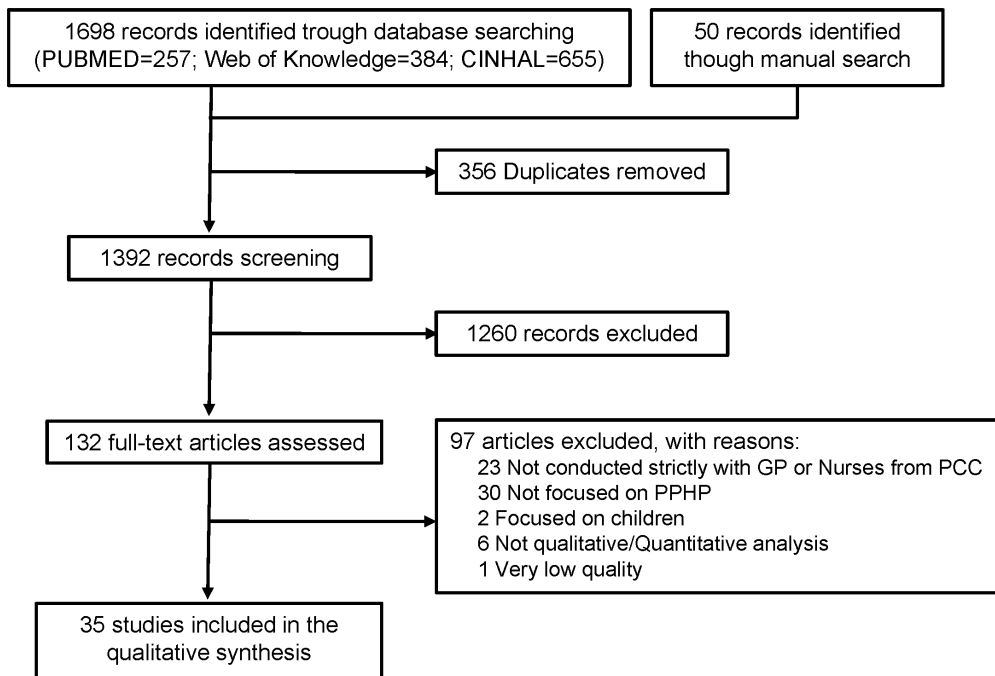

**Figure 1. Flow-chart of the systematic review.**  
doi:10.1371/journal.pone.0089554.g001

perceived to be scarce. This can affect motivation, changing the attitude towards PP&HP and setting up a vicious circle.

**Interpersonal factors.** From the PC professionals' point of view, the attitudes and behavior towards PP&HP of patients [9,23–29,31–52,54,55], specialists [34,43,44], practice managers [23,28,35,39,51] and colleagues [23,26,36,37,39,43,54] affect the feasibility of implementing PP&HP in PC.

The relationship that is established with the patient is mediated by their characteristics, their expectations about what will happen in the consulting room (usually related to the approach to the specific problem that brought the patient to the PCHC), and their own personal and economic resources. When the professional considers that the patient is not interested or does not have the resources to implement the required changes, he or she may decide not to invest time in providing advice on PP&HP. In fact, the professionals prefer not to implement PP&HP when they are concerned about damaging the patient-physician relationship, for instance, in dealing with issues related to alcohol consumption when this is not the motive for the consultation.

Other members of the PCHC team can act as facilitators, for example, the “champions” (colleagues who are highly motivated to implement PP&HP activities). A further facilitator is that the practice manager is involved and interested in these activities. Confidence in the competence of other PCHC team members could be a factor which predisposes the professional to implement the activities. The lack of coordination between different levels of care, such as the contradiction between messages coming from specialists and PC, complicates the implementation of PP&HP through PC.

**Institutional factors.** Professionals perceive that the biomedical model, which prioritizes disease treatment rather than prevention, is predominant in their institutions [8,9,23,25–27,34,35,38,39,41,46,47,52,54,55]. This affects the professionals' beliefs, as stated above (Intrapersonal factors), and the organization of the practice [45,51]. Professionals perceive that this

perspective leads to few resources being allocated to implementation of PP&HP. Workload, lack of time and lack of referral resources hamper the implementation of PP&HP [8,9,23–29,31,33–39,41–47,50,51–53,55]. On the other hand, professionals think that the primary health care setting is well placed and has the necessary credibility to implement PP&HP [9,25,29,31,36,38–40,43,44,46,49,53,54]. A facilitator is a well-organized practice where everyone knows their role regarding PP&HP and which has referral services within the practice (e.g., nutrition service) [9,23,25,28,29,31,35,36,39,41,42,45,46,51,53,55].

Financial incentives, such as management by objectives, which reinforce some strategies, are perceived as a facilitator in some cases. In others, they can be perceived as undermining clinical objectives by giving an incentive to provide interventions based on activities that are easy to measure, encouraging quantity rather than quality [32]. For instance, a management by objectives strategy that incentivizes reduction of the levels of some biological indicators can encourage the prescription of drugs to achieve a quick fix rather than implementing lifestyle changes.

Tools such as guidelines and alarms/reminders are seen as facilitators for PP&HP [23,25,28,29,33,35,36,40,41,43–45,47,49,50,51–54]. However, the usefulness of these tools is limited by whether the professionals consider implementation necessary.

**Community factors.** According to the professionals, the social, cultural and community context where the patient-physician interaction occurs will affect the decisions that the professional makes in relation to the initiation and development of PP&HP activities [9,25,28,31,36,37,40,44,45,49,52,53]. For instance, in deprived areas where the patients cannot afford the local resources they are referred to, PC professionals could decide not to assess lifestyles or risks. Also, professionals perceive the patients' cultural aspects (e.g., country of origin or religion) as a potential barrier if they think that they are in conflict with the potential interventions or if they are not aware of what these values might

**Table 1.** Study characteristics.

| Study | Fieldwork year(s)                | Country     | Participants                                              | Method of data collection                      | Aim (using original study wording)                                                                                                                                                                                                                              |
|-------|----------------------------------|-------------|-----------------------------------------------------------|------------------------------------------------|-----------------------------------------------------------------------------------------------------------------------------------------------------------------------------------------------------------------------------------------------------------------|
| 1     | Carlfjord 2012 [23]              | Sweden      | 9 GPs, 12 NPs, 6 nurse assistants, 3 allied professionals | Focus groups                                   | To explore Primary Health Care staff perceptions of handling <b>lifestyle issues</b> , including the consultation situation as well as the perceived usefulness of a lifestyle computer-based tool.                                                             |
| 2     | Søndergaard 2012 [24]            | Denmark     | 16 GPs                                                    | Focus groups                                   | To describe GPs' attitudes towards and concerns about providing <b>preventive health checks</b> and to describe their experiences with the health checks that they provide in daily practice.                                                                   |
| 3*    | Badertscher 2012 [25]            | Switzerland | 37 GPs                                                    | Focus groups                                   | To assess attitudes, possible barriers to and facilitators of physicians to provide <b>health promotion</b> for the elderly.                                                                                                                                    |
| 4     | Hernandez 2012 [26]              | USA         | 8 NP                                                      | Semi-structured interviews (narrative inquiry) | To explore the nurse practitioner experience with care for <b>prehypertensive</b> patients.                                                                                                                                                                     |
| 5     | Gunther 2012 [27]                | UK          | 7 GPs and 7 NPs                                           | Semi-structured interviews                     | To reveal and describe the barriers and enablers to implementing NICE's recommendations for general practice teams on the management of <b>obesity</b> in adults (in the context of a local guideline implementation initiative).                               |
| 6     | Nolan 2012 [28]                  | UK          | 22 NPs                                                    | Semi-structured interview                      | To identify factors impacting on NPs' role adequacy and legitimacy regarding <b>obesity</b> .                                                                                                                                                                   |
| 7     | Boase 2012 [29]                  | UK          | 28 Nurses                                                 | Semi-structured interviews and focus groups    | To consider the perspectives of practice nurses in terms of how they approach communicating <b>cardiovascular risk</b> to patients within their clinical practice and the way that might influence how that information is received.                            |
| 8     | Kirkegaard 2012 [30]             | Denmark     | 12 GPs                                                    | Focus groups                                   | To explore GPs' experienced difficulties with decision making and risk communication with patients with high cholesterol and risk of cardiovascular disease.                                                                                                    |
| 9     | Calderón 2011 [31]               | Spain       | 13 GPs                                                    | Focus groups                                   | To gain an in-depth understanding of GPs' and patients' perceptions about <b>health promotion and prevention</b> in Primary Health Care and to define the areas that could be improved in future interventions.                                                 |
| 10    | Gale 2011 [32]                   | UK          | 13 GPs                                                    | Single qualitative interview                   | To explore the attitudes of both patients and GPs towards <b>medication for primary prevention of cardiovascular disease</b> after they had received detailed information about cardiovascular disease risk and the absolute benefits of preventative medicine. |
| 11    | Müller-Riemenschneider 2010 [33] | Germany     | 24 GPs                                                    | Focus groups                                   | To assess the use of and attitudes regarding the use of <b>risk scores for major chronic diseases</b> among GPs and to identify potential barriers to the use of risk scores for healthy adults in primary care.                                                |
| 12*   | Walter 2010 [34]                 | German      | 32 GPs                                                    | Episodic interview                             | To identify and examine factors that promote and those that inhibit the implementation of <b>preventive care</b> for the elderly, as perceived by GPs, and to assess changes in physicians' attitudes toward preventive care throughout their careers.          |

**Table 1. Cont.**

| Study | Fieldwork year(s)        | Country             | Participants                                                                                                         | Method of data collection                 | Aim (using original study wording)                                                                                                                                                                                                                                                                                            |
|-------|--------------------------|---------------------|----------------------------------------------------------------------------------------------------------------------|-------------------------------------------|-------------------------------------------------------------------------------------------------------------------------------------------------------------------------------------------------------------------------------------------------------------------------------------------------------------------------------|
| 13*   | Heymann 2010 [35]        | Israel              | 59 GPs; 14 residents specialising in family medicine; 12 geriatricians                                               | Focus groups                              | To examine the barriers to <b>preventive health care</b> in the elderly among family physicians and to identify tools and devices that could help physicians augment these activities.                                                                                                                                        |
| 14    | Ampt 2009 [36]           | Australia           | 15 GPs and 1 NP                                                                                                      | Semi-structured interview                 | To identify the influences affecting GPs' choosing to screen and choosing to manage smoking, nutrition, alcohol consumption and physical activity ( <b>SNAP</b> ) <b>lifestyle risk factors</b> , as well as identify influences on screening and management when multiple SNAP factors exist.                                |
| 15    | Lambe 2009 [9]           | Republic of Ireland | 49 GPs and NP, 4 public health nurses, 1 social worker, 1 physiotherapist and 1 occupational therapist from the PCHC | Focus groups                              | To explore the views of primary health care practitioners about <b>behavioural risk factor management</b> in particular to the provision of <b>lifestyle counselling</b> . To identify barriers to behavioral risk factor management and to inform the development of a risk factor management tool kit for general practice. |
| 16    | Leverence 2007 [37]      | USA                 | 14 GPs, 7 pediatricians, 9 NP and practice assistants                                                                | In depth interviews and focus groups      | To examine the views of clinicians on <b>obesity counseling</b> and to compare these views to the recommendations of leading obesity guidelines.                                                                                                                                                                              |
| 17    | Graham 2005 [38]         | UK                  | 10 GPs and 2 NP                                                                                                      | Semi-structured interview                 | To investigate the <b>exercise</b> referral process from the health professional's perspective, specifically examining perceived barriers to referral, priority given to an exercise referral scheme in day-to-day consultations, perceived importance of their role in the process and referring practices.                  |
| 18    | Puig Ribera 2005 [39]    | Spain               | 18 GPs and 15 nurses                                                                                                 | Semi-structured interview and focus group | To explore the experiences of doctors/nurses in promoting <b>physical activity</b> in their day-to-day professional lives.                                                                                                                                                                                                    |
| 19    | Jacobsen 2005 [40]       | Denmark             | 5 GPs                                                                                                                | Focus groups                              | To discover the views of Danish GPs on the possibility of intervening in their patients' <b>lifestyle</b> in general and on the obstacles to doing so, based on their experience of participating in a health promotion study.                                                                                                |
| 20    | Johannsson 2005 [41]     | Sweden              | 26 nurses                                                                                                            | Focus groups                              | To identify under what circumstance nurses in primary care in Sweden are willing to engage in <b>alcohol</b> prevention and to what extent this is compatible with prevailing routines.                                                                                                                                       |
| 21    | Williams 2004 [42]       | UK                  | 21 GPs and 22 NPs                                                                                                    | Focus groups                              | To explore the views of GPs and NPs about the detection and management of people at risk of developing <b>type 2 diabetes</b>                                                                                                                                                                                                 |
| 22    | van Steenkiste 2004 [43] | The Netherlands     | 15 GP                                                                                                                | Observation and interview                 | To examine the barriers that prevent Gps from adopting the <b>cholesterol</b> guideline with its incorporated <b>risk tables</b> .                                                                                                                                                                                            |
| 23    | Hudon 2004 [44]          | Canada              | 35 GPs                                                                                                               | Focus groups                              | To present the obstacles perceived by family physicians in Quebec concerning the integration of <b>prevention</b> into their routine practices.                                                                                                                                                                               |
| 24    | Kedward 2003 [45]        | UK                  | 26 GPs                                                                                                               | Semi-structured interview                 | To identify GPs' views of the barriers to prescribing <b>statins</b> , their views of the use of statin guidelines, and their views of the barriers to, and successes in, implementation of <b>coronary heart disease prevention</b> in primary care.                                                                         |

Table 1. Cont.

| Study | Fieldwork year(s)  | Country     | Participants | Method of data collection                           | Aim (using original study wording)                                                                                                                                                                                                                                                                                    |
|-------|--------------------|-------------|--------------|-----------------------------------------------------|-----------------------------------------------------------------------------------------------------------------------------------------------------------------------------------------------------------------------------------------------------------------------------------------------------------------------|
| 25    | Fuller 2003 [46]   | UK          | 15 GPs       | Semi-structured interview                           | To investigate the views of GPs and their patients about <b>healthy eating</b> and the provision of healthy eating advice in general practice                                                                                                                                                                         |
| 26    | Mirand 2002 [47]   | USA         | 12 GPs       | Focus group                                         | To identify conceptual themes that characterize primary care physician attitudes, deterrents, and practice environments regarding <b>preventive care</b> and, on the basis of the findings and to establish the conceptual framework of an intervention tool that will best meet the needs of primary care practices. |
| 27    | Beich 2002 [48]    | Denmark     | 24 GPs       | Semi-structured interview and focus group           | To explore the suitability of a screening based intervention for excessive <b>alcohol</b> use by describing the experiences of general practitioners who tried such an intervention in their everyday practice.                                                                                                       |
| 28    | Lock 2002 [49]     | UK          | 24 nurses    | Semi-structured interviews                          | To examine primary health care nurses' attitudes to <b>alcohol</b> intervention, including perceived barriers and facilitating factors, which influence their involvement in this area of work.                                                                                                                       |
| 29    | Coleman 2000 [50]  | UK          | 42 GPs       | Observation of patient-GP interaction and interview | To elicit, realite and interpret GPs' accounts of why they discuss <b>smoking</b> with some patients and not others.                                                                                                                                                                                                  |
| 30    | Fairhurst 1998 [8] | UK          | 24 GP        | Semi-structured interview                           | To explore how general practitioners have accessed and evaluated evidence from trials on the use of <b>statin lipid lowering drugs</b> and incorporated this evidence into their practice.                                                                                                                            |
| 31    | Makrides 1997 [51] | Canada      | 31 GPs       | Semi-structured interview and focus group           | To explore the expectations of Nova Scotian physicians about their role in <b>prevention</b> , the obstacles they experience, and the mechanisms by which preventive care occurs.                                                                                                                                     |
| 32*   | Kerse 1997 [52]    | Australia   | 20 GPs       | Focus groups                                        | To explore GPs' beliefs about <b>health promotion</b> for older people and attitudes towards educational strategies likely to improve practice in this area.                                                                                                                                                          |
| 33    | Swinburn 1997 [53] | New Zealand | 25 GPs       | Focus group                                         | To assess the attitudes and perceptions of the GPs towards using the <b>green prescription</b> , and the feasibility of incorporating it into everyday practice.                                                                                                                                                      |
| 34    | Rush 1995 [54]     | UK          | 24 GP        | Semi-structured interview and focus group           | To elucidate family physicians' motivations concerning early intervention for <b>alcohol</b> use and their perceived barriers to such interventions.                                                                                                                                                                  |
| 35    | Williams 1994 [55] | UK          | 40 GPs       | Semi-structured interview                           | To explore the GPs' perceptions of <b>coronary heart disease prevention</b> .                                                                                                                                                                                                                                         |

GPs = General Practitioners (physicians); NPs = Nurse practitioners.

\*Studies focused on the elderly.

doi:10.1371/journal.pone.0089554.t001

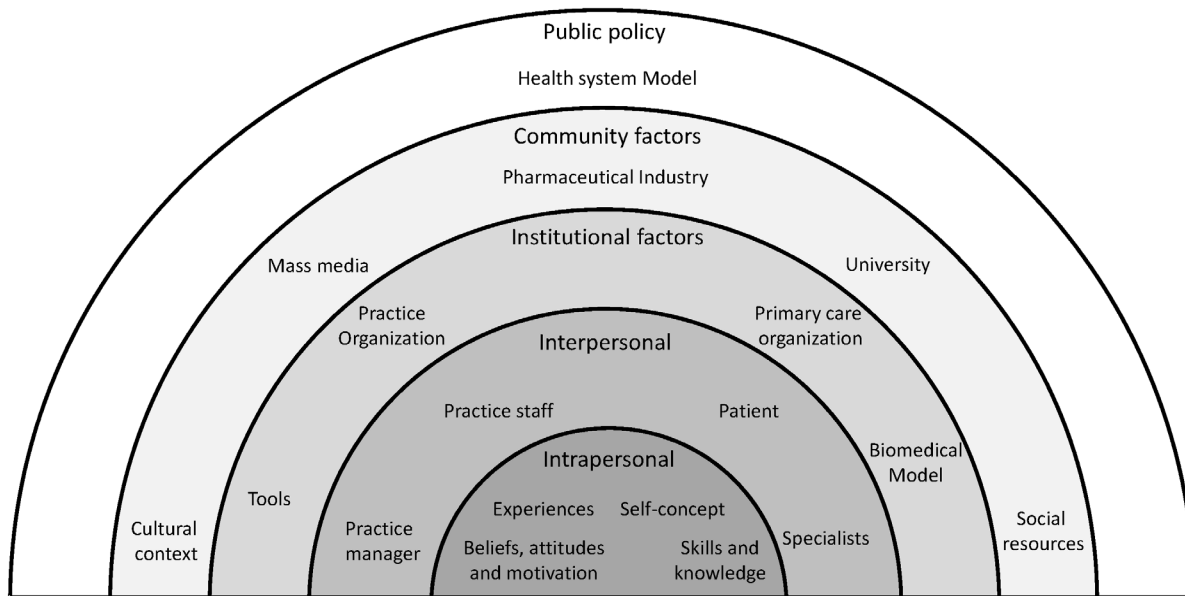

**Figure 2. Ecological model of the factors affecting the implementation of PP&HP activities by primary care professionals.**  
doi:10.1371/journal.pone.0089554.g002

be. Citizens' views can also affect what the professional feels is feasible to do in PC. For instance, drinking advice may be in conflict with citizens' views about drinking as a social activity. This could be supported by mass-media messages reinforcing the idea that moderate drinking can be a healthy habit [34,35,47,49,53,55]. Nevertheless, professionals believe that mass media campaigns can be a useful tool in reinforcing health promotion messages; as was shown with smoking cessation campaigns [54,55].

Professionals think that the curriculum in university and the pharmaceutical industry have an impact on their behavior [9,25,28,29,33,34,35,39–41,44,47–49,51–54]. Lack of undergraduate training in PP&HP activities is perceived as a barrier. With regard to the pharmaceutical industry, professionals feel that they are the object of marketing campaigns that promote the use of drugs to prevent diseases. Professionals feel that they are motivated through incentives given by pharmaceutical companies to prescribe drugs even when they perceive that the relative benefit of using drugs in comparison with lifestyle changes is not supported by the evidence [38,50].

**Public policy.** When extracting first and second-order constructs, the importance of the health system model emerged although it was not directly stated by the professionals interviewed. Socioeconomic and political context affects the distribution of resources as well as the position individuals or groups hold within societies. Although barriers and facilitators for PP&HP activities are very similar in private and public systems, they are generated by different mechanisms. For instance, in a Private Healthcare System, such as that in the USA, where patients must pay for each visit, professionals feel that patients will be unwilling to accept follow-up visits. In contrast, in National Health Systems where services are free at the point of use, such as in Spain or the UK, follow-up is hindered by workload and limited time per visit.

## Discussion

The present synthesis of 35 original qualitative papers illustrates physicians and nurses' perceptions about the difficulties that they face when implementing PP&HP activities in primary care. The

appropriateness of conducting these activities in primary care is not, in general, discussed by these professionals. However, the level of implementation is recognized as being low. Factors affecting implementation were fitted into a five-level ecological model going from Micro to Macro factors (Intrapersonal, Interpersonal, Institutional, Community and Public policy). The majority of barriers cited by the professionals are considered external barriers beyond their control, although the lack of self-criticism expressed is remarkable, as has been pointed out by Hudon [44].

## Implications for Practice

If PP&HP activities are to be successfully implemented and maintained over time in primary care settings, a series of factors needs to be taken into account. Table 3 summarizes the practical implications of the results of the synthesis.

One of the main factors affecting the implementation of PP&HP activities is related to the beliefs, attitudes and motivations of professionals. According to the theory of planned behavior [56], primary care professionals' intention to implement PP&HP depends on the professionals' attitude toward PP&HP, subjective norms and the professionals' perceived control over the implementation of these activities. Erroneous beliefs about PP&HP activity effectiveness can easily be corrected by generating a rich body of evidence and using it to support the promotion of the activities. To achieve a change in the beliefs, attitudes and motivations of professionals, it is essential that there is adequate knowledge transfer from the scientific community to, on the one hand, policy-makers so that they can conduct a top-down transfer and, on the other, to clinicians who can provide a complementary bottom-up approach [57]. In addition, the skills required to carry out PP&HP activities should be included in health professionals' training in university education and subsequent continuous training, moving from a biomedical to a biopsychosocial model of care. This would be useful on two levels: providing the necessary skills (i.e. for risk assessment and motivational interview) and reinforcing the professionals' self-concept. This will impact in the perceived control over the implementation of PP&HP and in the



**Table 2.** Translation of 1st and 2nd order constructs and interpretation through 3rd order constructs and sources.

| 3rd order FACTORS                                                                                                        | 3rd order constructs | 2nd order constructs (translated)                                                                                                                           | Sources <sup>△</sup>                                                                                                                                                                      |                                               |
|--------------------------------------------------------------------------------------------------------------------------|----------------------|-------------------------------------------------------------------------------------------------------------------------------------------------------------|-------------------------------------------------------------------------------------------------------------------------------------------------------------------------------------------|-----------------------------------------------|
| INTRAPERSONAL factors                                                                                                    | Experiences          | Experiences dealing with the problem                                                                                                                        | 8, 12, 28, 29                                                                                                                                                                             |                                               |
|                                                                                                                          |                      | Skills and knowledge                                                                                                                                        | Evaluation of risk, communicative skills, motivational interview, counseling                                                                                                              | 1, 2, 4–8, 10–16, 19–28, 31–32                |
|                                                                                                                          | Self-concept         | Lack of knowledge about available resources for referral                                                                                                    | Lack of knowledge about available resources for referral                                                                                                                                  | 3, 6, 7, 9, 12, 14–16, 18, 20, 21, 23, 31, 32 |
|                                                                                                                          |                      |                                                                                                                                                             | Lack of knowledge about available clinical guidelines                                                                                                                                     | 6, 11, 14, 15, 18, 26, 30                     |
|                                                                                                                          |                      | Self-confidence                                                                                                                                             | 1, 5–7, 13, 15, 16, 20, 26–28, 31–33                                                                                                                                                      |                                               |
|                                                                                                                          |                      | Professional as a role model or example to the patient (self-experience with the problem)                                                                   | 12, 18, 25, 28                                                                                                                                                                            |                                               |
|                                                                                                                          | Beliefs              | Risk is not a disease (primary care professionals' duty is to treat disease)                                                                                | 7, 18                                                                                                                                                                                     |                                               |
|                                                                                                                          |                      | PP&HP is not effective/efficient                                                                                                                            | 2, 3, 6–10, 12–19, 21, 22, 24, 25, 27, 30, 32, 33, 35                                                                                                                                     |                                               |
|                                                                                                                          |                      | PP&HP is (not) primary care professionals' duty/responsibility (professional perception and/or "obligation")                                                | 1–3, 5, 6, 9, 12, 14–22, 25–28, 31–35                                                                                                                                                     |                                               |
|                                                                                                                          |                      | PP&HP is utopian                                                                                                                                            | 9                                                                                                                                                                                         |                                               |
|                                                                                                                          |                      | PP&HP only makes sense in high risk patients but not in general population                                                                                  | 6, 16, 18–20, 25, 27, 30, 31, 33, 34                                                                                                                                                      |                                               |
|                                                                                                                          |                      | Negative aspects of available guidelines (depersonalize, not adapted to local services, not looking beyond ticking-the-box, lack of consistency, unethical) | 5–11, 18, 22–24, 28, 30, 34                                                                                                                                                               |                                               |
|                                                                                                                          | Interpersonal        | Practice staff                                                                                                                                              | Negative aspects of risk assessment, use of risk scores (morality of risk calculation, risk police, personal circumstances not taken into account, do not contribute any new information) | 7, 8, 11, 15, 19, 22, 23, 27, 31, 33          |
|                                                                                                                          |                      |                                                                                                                                                             | Medicalization of life                                                                                                                                                                    | 11, 21, 22, 30                                |
|                                                                                                                          |                      |                                                                                                                                                             | Use of preventive drugs (Easier than changing unhealthy lifestyles)                                                                                                                       | 10, 22, 24, 30                                |
|                                                                                                                          |                      |                                                                                                                                                             | Professional interest in PP&HP                                                                                                                                                            | 12–14, 17, 23, 27, 31                         |
| Attitudes                                                                                                                |                      | For or against the implementation of PP&HP in primary care                                                                                                  | 1–3, 5, 6, 9, 12, 14–22, 25–28, 31–35                                                                                                                                                     |                                               |
| Patient                                                                                                                  |                      | Confidence in the colleagues at the Primary Care Health Center                                                                                              | 1, 4, 14, 16, 22, 34                                                                                                                                                                      |                                               |
|                                                                                                                          |                      | "Champions", active promoters                                                                                                                               | 1, 18                                                                                                                                                                                     |                                               |
|                                                                                                                          |                      | Characteristics of the patient: age (motivation increases with age), psychological comorbidity.                                                             | 8, 12, 13, 29, 32                                                                                                                                                                         |                                               |
|                                                                                                                          |                      | Lack of patient resources (economic, social, educational, and temporal)                                                                                     | 4, 12–14, 16, 18, 23, 31, 32, 35                                                                                                                                                          |                                               |
|                                                                                                                          |                      | Lack of interest and adherence, denial of responsibility and lack of feedback                                                                               | 1, 4–7, 10, 12, 14–18, 21, 23–28, 31, 32, 35                                                                                                                                              |                                               |
|                                                                                                                          | Silver bullet        | 23, 26                                                                                                                                                      |                                                                                                                                                                                           |                                               |
| Institutional                                                                                                            | Practice manager     | Demanding patient/Consumer patient (active role requesting/ expecting the service)                                                                          | 2, 11, 12, 14, 22, 32, 35                                                                                                                                                                 |                                               |
|                                                                                                                          |                      | Patient agenda                                                                                                                                              | 1, 7, 8, 11, 15, 18, 19, 23, 25–27, 29, 31                                                                                                                                                |                                               |
|                                                                                                                          |                      | Side effects of PP&HP, can have an impact on the patient-professional relationship                                                                          | 1–3, 6, 8, 10, 17, 19, 20, 24, 27–29, 32, 34, 35                                                                                                                                          |                                               |
|                                                                                                                          |                      | Management commitment to PP&HP                                                                                                                              | 1, 6, 13, 18, 31                                                                                                                                                                          |                                               |
|                                                                                                                          | Specialists          | Contradictory advice/discourse, fragmentation of care                                                                                                       | 12, 22, 23                                                                                                                                                                                |                                               |
|                                                                                                                          | Biomedical model     | Prioritizes the treatment of the disease instead of PP&HP, few resources assigned to PP&HP                                                                  | 1, 3–5, 12, 13, 15, 17, 18, 21, 25, 26, 30, 32, 34, 35                                                                                                                                    |                                               |
|                                                                                                                          |                      | Ideal setting for PP&HP: credibility, well placed, continuity of care (facilitates spontaneous follow-up)                                                   | 3, 7, 9, 14, 15, 17–19, 22, 23, 25, 28, 33, 34                                                                                                                                            |                                               |
|                                                                                                                          |                      | Workload/Lack of time                                                                                                                                       | 1–7, 9, 11–18, 20–27, 29–33, 35                                                                                                                                                           |                                               |
| Lack of financial incentives for the service or the professional (Quality Outcomes Framework or Direction by Objectives) |                      | 1, 3–5, 7, 10, 11–13, 15, 23, 26, 31–33                                                                                                                     |                                                                                                                                                                                           |                                               |

**Table 2. Cont.**

| 3rd order FACTORS | 3rd order constructs         | 2nd order constructs (translated)                                                                                                                                    | Sources <sup>△</sup>                                 |
|-------------------|------------------------------|----------------------------------------------------------------------------------------------------------------------------------------------------------------------|------------------------------------------------------|
|                   | Practice organization        | Role clarification and organized teams inside the Primary Care Health Center for referral and/or follow-up                                                           | 1, 3, 6, 7, 9, 13–15, 18, 20, 21, 24, 25, 31, 33, 35 |
|                   |                              | Inadequate space, office organization, insufficient storage for preventive drugs                                                                                     | 24, 31                                               |
|                   |                              | Flexible booking system                                                                                                                                              | 31                                                   |
|                   | Tools                        | Guidelines for risk assessment and interventions (useful as threshold to start treatment)                                                                            | 1, 3, 7, 11, 19, 24, 28                              |
|                   |                              | Reminders (computerized or otherwise), programmed campaigns of risk assessment/promotion of healthy lifestyles (i.e. physical activity trimester, alcohol trimester) | 11, 14, 20, 22, 24, 26, 29, 31, 32, 34               |
|                   |                              | Tools for better management or referral (computerized tools, web pages, leaflets, green prescriptions, etc.)                                                         | 1, 3, 6, 8, 13, 14, 23, 26, 28, 32–34                |
| Community         | Pharmaceutical industry      | Promotes prescription of preventive drugs instead of lifestyles changes                                                                                              | 18, 30                                               |
|                   | University                   | Lack of focus and/or education and training on PP&HP and the necessary skills to develop them                                                                        | 3, 6, 7, 11–13, 15, 18–20, 23, 26–28, 31–34          |
|                   | Social context and resources | Patients' social circumstances that limit the possible interventions/referral (e.g., dangerous neighborhood, lack of affordable resources)                           | 9, 15, 16, 19                                        |
|                   | Cultural context             | Immigrant patients: Language barriers, lack of culturally appropriate materials, awareness of patients' cultural differences when providing advice.                  | 6, 14, 24, 34                                        |
|                   |                              | No social interest in investing in the elderly                                                                                                                       | 3, 28, 33                                            |
|                   |                              | Lay people's views about PP&HP (patients think is about being checked, importance of obesity, smoking, drinking as beneficial, drinking as social activity).         | 16, 23, 28, 34                                       |
|                   | Mass media                   | Importance given to PP&HP; Influence of role models on the patient.                                                                                                  | 12, 13, 26, 28, 33, 35                               |
|                   |                              | Social marketing campaigns that reinforce the message from primary care professionals.                                                                               | 34, 35                                               |
| Public policy     | Health system model          | Public or private models influence investment, payment for follow-up, referral, etc.                                                                                 | *                                                    |

\*It is not state in a particular paper but emerged when translating the papers from different countries.

<sup>△</sup>The numbers correspond to the numbers of the 35 included in the review as they are presented in Table 2. Lower numbers indicate newer studies and vice versa. doi:10.1371/journal.pone.0089554.t002

intention to implement it [56]. The policies must incentivize PP&HP at different levels, motivating managers whose teams will carry out the implementation and launching health education and social marketing campaigns with the aim of increasing social awareness of the importance of PP&HP in health care. In addition to facilitate the development of primary prevention and health promotion activities by reducing the side-effects of PP&HP on the patient-physician relationship, if professionals perceive that managers and patients want them to implement PP&HP (positive subjective norm), they would present higher motivation to do it [56]. At a more basic level, the health center would need to build well-coordinated teams where members have clearly defined roles in relation to PP&HP. Managers will need to facilitate self-management with respect to professionals' agendas so that they can adapt to timetable changes and patient follow-up.

Activities should be tailored and adapted to the PC context as well as to the social, cultural and community context of each area where implementation takes place to encourage the acceptability, feasibility and sustainability of the interventions/activities [58]. In this way, the problem of adaptation to health recommendations and clinical practice guidelines in the real PC context and the community where they are implemented can be solved, changing the negative attitudes of GPs and nurses to guidelines. The

mechanisms through which the factors affecting PP&HP activities are generated can differ between public and private systems. This also needs to be taken into account.

To maintain awareness of the sociocultural context, it is important to facilitate the creation of teams within the PC center, as well as professional training and adaptation to the recommendations made at the health center itself. This is related to patient-centered health care, with comprehensive care and health care continuity [59]. It is important that policies promote integrated care between formal and informal community and health system resources [60]. Thus, it is crucial that the PC center is in contact with community social resources (e.g., gymnasiums, pharmacies, associations, schools) to coordinate the use of these resources and reach agreement on activity protocols with all interested parties. These resources should be included in the adapted guides in each of the centers. Within the health system, the coordination of health services should be improved along with communication channels to avoid sending contradictory messages on PP&HP.

Useful tools may include the use of assessment campaigns (e.g., the alcohol trimester, the exercise trimester) which could provide professionals with the excuse to deal with issues that could be perceived as delicate. The use of reminders in computerized clinical histories is, in theory, a good strategy although their real

**Table 3.** Practical implications of the results of the synthesis.

|                                                                                                                                                         |
|---------------------------------------------------------------------------------------------------------------------------------------------------------|
| <b>INTERPERSONAL</b>                                                                                                                                    |
| Evidence based information (knowledge transfer bottom-up)                                                                                               |
| Training in risk/communication of risk                                                                                                                  |
| Training in communication skills and motivational interviews                                                                                            |
| <b>INTRAPERSONAL</b>                                                                                                                                    |
| Motivation of the practice manager and center staff                                                                                                     |
| Health literacy strategies                                                                                                                              |
| Tailored interventions based on patients' social and cultural priorities                                                                                |
| Team building within the PCHC (role clarification)                                                                                                      |
| Coordination with specialized care (stepped care)                                                                                                       |
| <b>INSTITUTIONAL</b>                                                                                                                                    |
| Protocol guides adapted to the characteristics of the center and area                                                                                   |
| PP&HP approach strategies ("The X trimester"; Alarms/reminders)                                                                                         |
| Self-management of agenda by professionals                                                                                                              |
| Self-management of PC center resources                                                                                                                  |
| <b>COMMUNITY</b>                                                                                                                                        |
| Coordination of PC professionals with formal and informal community resources available (social prescribing)                                            |
| Inclusion of PP&HP, biopsychosocial model and person-centered care in university education.                                                             |
| Mass media campaigns (social marketing) to inform the population of the importance of PP&HP activities and what they can expect from the health system. |
| Control of mass media campaigns and the impact of the pharmaceutical industry on activities that run against healthy living habits (e.g., smoking)      |
| <b>POLICY</b>                                                                                                                                           |
| Higher investment in primary care and PP&HP                                                                                                             |
| Promotion of community and social resources (integrated care).                                                                                          |
| Inform policy makers about the benefits of preventive activities (Knowledge transfer top-down)                                                          |

doi:10.1371/journal.pone.0089554.t003

effectiveness will be conditioned by the attitude of the professional; too many tools could overwhelm the professional.

The informants in some of the studies identified in the search represented professional groups other than GPs and nurses like in the study by Blumenthal 2007 [61] (dietitians, administrators, social workers and pharmacists) or Ribera 2006 [62] (politicians, researchers, academics, representatives of family medicine associations, physical activity professionals and reporters). These studies were excluded because the specific discourse of the GPs and nurses could not be discerned. However, these studies noted the importance in PP&HP activities of other professionals within the PCHC (such as health workers or health assistants) or even from outside the PCHC (i.e. politicians or pharmacists). The inclusion of these other categories of professionals could alleviate the workload of the GPs and nurses.

### Implications for Research

As this review shows, there is a great deal of information on what are referred to as the barriers and facilitators which affect the implementation of PP&HP activities in PC from the perspective of the physicians and nurses. However, the majority of these studies have not taken into account the fact that the PC focus is comprehensive and multifactorial and there is not much information on barriers in relation to PP&HP aimed at multi-risk management. In only one of the studies identified was this problem tackled [36]. Further research needs to be conducted to assess this issue.

The results of this synthesis should be complemented with a synthesis on the barriers and facilitators in PP&HP from the point

of view of the patients who would receive the interventions and any other professionals who may be involved.

Our review has revealed that there are certain deficiencies, at least with respect to reporting the methodology employed in the qualitative studies on this issue. As mentioned previously, most studies do not describe the researchers' theoretical focus, the sociocultural context, sampling methods or the analysis, while details available on measures taken to ensure rigor are scarce. This could be due to limited space in biomedical journals where these types of studies are typically published.

However, regarding qualitative synthesis of results, it has been suggested that 'inclusion of poor quality studies is unlikely to have a very distorting impact on qualitative synthesis' [63].

With respect to the implications for practice that result from this study, it is important to assess the effectiveness of the recommendations described.

### Strengths and Limitations

To the best of our knowledge, this is the first attempt to synthesize all the available evidence regarding factors affecting PP&HP implementation in PC from the professionals' perspective. The strengths of this meta-ethnographic synthesis lie in the extensive literature search. Moreover, the inclusion of papers detailing different theoretical approaches provided in-depth insight into the study topic. A multi-disciplinary team enriched the results of the synthesis as they were able to provide various re-interpretations of the findings. At least two researchers participated independently at every step of the synthesis and then triangulated the results. This synthesis was also externally audited

by both a group of qualitative researchers and a multidisciplinary team of primary care professionals from different Spanish regions. These increased the credibility, consistency and confirmability of the results of the synthesis [15,64].

Regarding limitations, the synthesis only took into account the views of physicians and nurses. These are the main players in the implementation of PP&HP activities in PC. However, we excluded the perspective of other professionals in PCHC as well as those of the patient and community. This needs to be addressed in future research as stated above.

Finally, we may have missed relevant information as we only searched 3 electronic databases, we only included English and Spanish studies and we did not search gray literature. However, the electronic search was extensive and complemented by hand-searches and advice from experts in the field. The amount of information retrieved was considerable and enough to saturate the information.

## Conclusions

We have carried out a global qualitative synthesis on PP&HP from the perspective of physicians and nurses that can be applied to any context and any of the PP&HP activities. This review takes into account the different levels (Fig. 2) from the perspective of the professionals and how these levels are inter-related. A lack of research on barriers and facilitators has been detected in the implementation of PP&HP activities in multi-risk management.

## References

- Shaw K, Gennat H, O'Rourke P, Del MC (2006) Exercise for overweight or obesity. *Cochrane Database Syst Rev* : CD003817.
- Rees K, Dyakova M, Ward K, Thorogood M, Brunner E (2013) Dietary advice for reducing cardiovascular risk. *Cochrane Database Syst Rev* 3: CD002128.
- Costa B, Barrio F, Cabre JJ, Pinol JL, Cos X, et al. (2012) Delaying progression to type 2 diabetes among high-risk spanish individuals is feasible in real-life primary healthcare settings using intensive lifestyle intervention. *Diabetologia* 55: 1319–1328.
- Rasmussen SR, Thomsen JL, Kilsmark J, Hvenegaard A, Engberg M, et al. (2007) Preventive health screenings and health consultations in primary care increase life expectancy without increasing costs. *Scand J Public Health* 35: 365–372.
- Brotons C, Soriano N, Moral I, Rodriguez-Artalejo F, Banegas JR, et al. (2012) Prevention in primary care: the example of the program for prevention and health promotion. *SESPAS report 2012. Gac Sanit* 26 Suppl 1: 151–157.
- Starfield B (1992) Primary care: Concept, evaluation and policy. New York: Oxford University Press.
- World Health Organization (2008) The world health report: Primary health care (now more than ever).
- Fairhurst K, Huby G (1998) From trial data to practical knowledge: Qualitative study of how general practitioners have accessed and used evidence about statin drugs in their management of hypercholesterolaemia. *BMJ* 317: 1130–1134.
- Lambe B, Collins C (2010) A qualitative study of lifestyle counselling in general practice in Ireland. *Fam Pract* 27: 219–223.
- Fixsen DL, Naoom SF, Blase KA, Friedman RM, Wallace F (2005) Implementation Research: A Synthesis of the Literature. Tampa, FL: University of South Florida, Louis de la Parte Florida Mental Health Institute, The National Implementation Research Network (FMHI Publication #231).
- Campbell M, Fitzpatrick R, Haines A, Kinmonth AL, Sandercock P, et al. (2000) Framework for design and evaluation of complex interventions to improve health. *BMJ* 321: 694–696.
- Campbell NC, Murray E, Darbyshire J, Emery J, Farmer A, et al. (2007) Designing and evaluating complex interventions to improve health care. *BMJ* 334: 455–459.
- Noblit GW, Hare RD. (1988) Meta-ethnography: Synthesizing qualitative studies. Newbury Park, California: Sage.
- Britten N, Campbell R, Pope C, Donovan J, Morgan M, et al. (2002) Using meta ethnography to synthesise qualitative research: A worked example. *J Health Serv Res Policy* 7: 209–215.
- Pope C, Mays N, Popay J (2007) Synthesizing qualitative and quantitative health evidence: A guide to methods. Maidenhead: Open University Press.
- Mays N, Pope C (2000) Qualitative research in health care: assessing quality in qualitative research. *BMJ* 320: 50–52.
- Calderon C (2002) Quality criteria in qualitative research in health: Notes for a necessary debate. *Rev Esp Salud Publica* 76: 473–482.

Moreover, the conceptual overview provided by the synthesis resulted in the development of some practical recommendations for the design of PP&HP in PC. However, the effectiveness of these recommendations needs to be demonstrated.

## Supporting Information

**Table S1** Detailed search strategies in electronic databases. (DOC)

## Acknowledgments

This study was carried out with the help from the Network of Preventive Activities and Health Promotion in Primary Care [Red de Actividades Preventivas y Promoción de la Salud en Atención Primaria; redIAPP] granted by the Carlos III Health Institute [Instituto de Salud Carlos III]. We thank Edurne Zabaleta from the Network of Preventive Activities and Health Promotion in Primary Care for her contributions to the search strategy.

We thank Maria Luisa Vázquez for the “Qualitative Health Research Group” of the “Consorti de Salut i Social de Catalunya” for their external audit of the project.

## Author Contributions

Conceived and designed the experiments: MRV AF. Performed the experiments: MRV MPV MMA PMP AB AF. Analyzed the data: MRV MPV MMA PMP AB AF. Wrote the paper: MRV MPV MMA PMP AB AF.

- Dixon-Woods M, Sutton A, Shaw R, Miller T, Smith J, et al. (2007) Appraising qualitative research for inclusion in systematic reviews: A quantitative and qualitative comparison of three methods. *J Health Serv Res Policy* 12: 42–47.
- Lamb J, Bower P, Rogers A, Dowrick C, Gask L (2012) Access to mental health in primary care: A qualitative meta-synthesis of evidence from the experience of people from ‘hard to reach’ groups. *Health (London)* 16: 76–104.
- Pound P, Britten N, Morgan M, Yardley L, Pope C, et al. (2005) Resisting medicines: A synthesis of qualitative studies of medicine taking. *Soc Sci Med* 61: 133–155.
- Blaxter M. (1996) Criteria for the evaluation of qualitative research papers. *Medical Sociology News* 22: 68–71.
- McLeroy KR, Bibeau D, Steckler A, Glanz K (1988) An ecological perspective on health promotion programs. *Health Educ Q* 15: 351–377.
- Carlford S, Lindberg M, Andersson A (2012) Staff perceptions of addressing lifestyle in primary health care: A qualitative evaluation 2 years after the introduction of a lifestyle intervention tool. *BMC Family Practice* 13: 99. Available: <http://www.biomedcentral.com/1471-2296/13/99>. Accessed 29 July 2013.
- Sondergaard A, Christensen B, Maindal HT (2012) Diversity and ambivalence in general practitioners’ attitudes towards preventive health checks - a qualitative study. *Bmc Family Practice* 13: 53. Available: <http://www.biomedcentral.com/1471-2296/13/53>. Accessed 29 July 2013.
- Badertscher N, Rossi N, Rieder A, Herter-Clavel C, Rosemann T, et al. (2012) Attitudes, barriers and facilitators for health promotion in the elderly in primary care. A qualitative focus group study. *Swiss Med Wkly* 142:13606. Available: <http://www.smw.ch/content/smw-2012-13606/>. Accessed 29 July 2013.
- Hernandez J, Anderson S (2012) Storied experiences of nurse practitioners managing prehypertension in primary care. *J Am Acad Nurse Pract* 24: 89–96.
- Gunther S, Guo F, Sinfield P, Rogers S, Baker R (2012) Barriers and enablers to managing obesity in general practice: A practical approach for use in implementation activities. *Quality in primary care* 20: 93–103.
- Nolan C, Dechan A, Wylie A, Jones R (2012) Practice nurses and obesity: Professional and practice-based factors affecting role adequacy and role legitimacy. *Prim Health Care Res Dev* : 1–11.
- Boase S, Mason D, Sutton S, Cohn S (2012) Tinkering and tailoring individual consultations: How practice nurses try to make cardiovascular risk communication meaningful. *J Clin Nurs* 21: 2590–2598.
- Calderon C, Balague L, Cortada JM, Sanchez A (2011) Health promotion in primary care: How should we intervene? A qualitative study involving both physicians and patients. *BMC Health Serv Res* 11:62. Available: <http://www.biomedcentral.com/1472-6963/11/62>. Accessed 29 July 2013.
- Gale NK, Greenfield S, Gill P, Guttridge K, Marshall T (2011) Patient and general practitioner attitudes to taking medication to prevent cardiovascular disease after receiving detailed information on risks and benefits of treatment: A

- qualitative study. *BMC Family Practice* 12: 26. Available: <http://www.biomedcentral.com/1471-2296/12/59>. Accessed 29 July 2013.
32. Muller-Riemenschneider F, Holmberg C, Rieckmann N, Kliems H, Rufer V, et al. (2010) Barriers to routine risk-score use for healthy primary care patients: Survey and qualitative study. *Arch Intern Med* 170: 719–724.
  33. Walter U, Flick U, Neuber A, Fischer C, Hussein RJ, et al. (2010) Putting prevention into practice: Qualitative study of factors that inhibit and promote preventive care by general practitioners, with a focus on elderly patients. *BMC Fam Pract* 11:68. Available: <http://www.biomedcentral.com/1471-2296/11/68> Accessed 29 July 2013.
  34. Heymann AD, Bentur N, Valinsky L, Lemberger J, Elhayany A (2010) The perceived performance, barriers and solutions for the good preventive care of elderly people in israel. *Qual Prim Care* 18: 173–179.
  35. Ampt AJ, Amoroso C, Harris MF, McKenzie SH, Rose VK, et al. (2009) Attitudes, norms and controls influencing lifestyle risk factor management in general practice. *BMC Fam Pract* 10:59. Available: <http://www.biomedcentral.com/1471-2296/10/59> Accessed 29 July 2013.
  36. Leverage RR, Williams RL, Sussman A, Crabtree BF, Rios NC (2007) Obesity counseling and guidelines in primary care - A qualitative study. *Am J Prev Med* 32: 334–339.
  37. Graham RC, Dugdill L, Cable NT (2005) Health professionals' perspectives in exercise referral: Implications for the referral process. *Ergonomics* 48: 1411–1422.
  38. Ribera AP, McKenna J, Riddoch C (2005) Attitudes and practices of physicians and nurses regarding physical activity promotion in the catalan primary health-care system. *Eur J Public Health* 15: 569–575.
  39. Jacobsen ET, Rasmussen SR, Christensen M, Engberg M, Lauritzen T (2005) Perspectives on lifestyle intervention: The views of general practitioners who have taken part in a health promotion study. *Scand J Public Health* 33: 4–10.
  40. Johansson K, Akerlind I, Bendtsen P (2005) Under what circumstances are nurses willing to engage in brief alcohol interventions? A qualitative study from primary care in sweden. *Addict Behav* 30: 1049–1053.
  41. Williams R, Rapport F, Elwyn G, Lloyd B, Rance J, et al. (2004) The prevention of type 2 diabetes: General practitioner and practice nurse opinions. *Br J Gen Pract* 54: 531–535.
  42. Van Steenkiste BT, Stoffers HE, Grol R (2004) Barriers to implementing cardiovascular risk tables in routine general practice. *Scandinavian Journal of Primary Health Care* 22: 32–37.
  43. Hudon E, Beaulieu MD, Roberge D (2004) Integration of the recommendations of the canadian task force on preventive health care - obstacles perceived by a group of family physicians. *Fam Pract* 21: 11–17.
  44. Kedward J, Dakin L (2003) A qualitative study of barriers to the use of statins and the implementation of coronary heart disease prevention in primary care. *Br J Gen Pract* 53: 684–689.
  45. Fuller TL, Backett-Milburn K, Hopton JL (2003) Healthy eating: The views of general practitioners and patients in scotland. *Am J Clin Nutr* 77: 1043S–1047S.
  46. Mirand AL, Beehler GP, Kuo CL, Mahoney MC (2002) Physician perceptions of primary prevention: Qualitative base for the conceptual shaping of a practice intervention tool. *BMC Public Health* 2:16. Available: <http://www.biomedcentral.com/1471-2296/2/16> Accessed 29 July 2013.
  47. Beich A, Gannik D, Malterud K (2002) Screening and brief intervention for excessive alcohol use: Qualitative interview study of the experiences of general practitioners. *BMJ* 325: 870. Available: <http://www.bmj.com/content/325/7369/870> Accessed 29 July 2013.
  48. Lock CA, Kaner E, Lamont S, Bond S (2002) A qualitative study of nurses' attitudes and practices regarding brief alcohol intervention in primary health care. *J Adv Nurs* 39: 333–342.
  49. Coleman T, Murphy E, Cheater F (2000) Factors influencing discussion of smoking between general practitioners and patients who smoke: A qualitative study. *British Journal of General Practice* 50: 207–210.
  50. Makrides L, Veinot PL, Richard J, Allen MJ (1997) Primary care physicians and coronary heart disease prevention: A practice model. *Patient Education & Counseling* 32: 207–217.
  51. Kerse NM, Murphy MJ, Flicker L, Young D (1997) Health promotion and older people: A qualitative study of general practitioners' views. *Med J Aust* 167: 423–427.
  52. Swinburn BA, Walter LG, Arroll B, Tilyard MW, Russell DG (1997) Green prescriptions: Attitudes and perceptions of general practitioners towards prescribing exercise. *British Journal of General Practice* 47: 567–569.
  53. Swinburn BA, Walter LG, Arroll B, Tilyard MW, Russell DG (1997) Green prescriptions: Attitudes and perceptions of general practitioners towards prescribing exercise. *British Journal of General Practice* 47: 567–569.
  54. Rush BR, Powell LY, Crowe TG, Ellis K (1995) Early intervention for alcohol-use - family physicians motivations and perceived barriers. *Can Med Assoc J* 152: 863–869.
  55. Williams SJ, Calnan M (1994) Perspectives on prevention: The views of general practitioners. *Sociol Health Ill* 16: 372–393.
  56. Ajzen I (1991) The theory of planned behavior. *Organizational Behavior & Human Decision Processes*, 50: 179–211.
  57. Albert D, Fortin R, Lessio A, Herrera C, Riley B, et al. (2013) Strengthening chronic disease prevention programming: The toward evidence-informed practice (TEIP) program assessment tool. *Prev Chronic Dis* 10: E88. Available: [http://www.cdc.gov/pcd/issues/2013/12\\_0107.htm](http://www.cdc.gov/pcd/issues/2013/12_0107.htm) Accessed 29 July 2013.
  58. Bosch-Capblanch X, Lavis JN, Lewin S, Atun R, Rottingen JA, et al. (2012) Guidance for evidence-informed policies about health systems: Rationale for and challenges of guidance development. *PLoS Med* 9: e1001185. Available: [www.plosmedicine.org/article/info%3Adoi%2F10.1371%2Fjournal.pmed.1001185](http://www.plosmedicine.org/article/info%3Adoi%2F10.1371%2Fjournal.pmed.1001185) Accessed 29 July 2013.
  59. Epstein RM, Fiscella K, Lesser CS, Stange KC (2010) Why the nation needs a policy push on patient-centered health care. *Health Aff (Millwood)* 29: 1489–1495.
  60. Brandling J, House W (2009) Social prescribing in general practice: Adding meaning to medicine. *Br J Gen Pract* 59: 454–456.
  61. Blumenthal DS (2007) Barriers to the provision of smoking cessation services reported by clinicians in underserved communities. *J Am Board Fam Med* 52: 272–279.
  62. Ribera AP, McKenna J, Riddoch C (2006) Physical activity promotion in general practices of Barcelona: a case study. *Health Educ Res* 21: 538–548.
  63. Campbell R, Pound P, Morgan M, Daker-White G, Britten N, et al. (2011) Evaluating meta-ethnography: Systematic analysis and synthesis of qualitative research. *Health Technol Assess* 15: 1–164.
  64. Vázquez ML, da Silva MRF, Mogollon AS, Fdez Sanmamed MJ, Delgado ME, et al. (2006) Introduccion a las técnicas cualitativas de investigación aplicadas en salud. Barcelona: UAB Servei de publicacions.
